# Supplementary material for: Crystal data behind efficient cesium recognition: triphenylcyanoborates of potassium, rubidium, and cesium
Source: Royal Society of Chemistry journal article supplement (doi:10.1039/c1ce05723e), 2011-01-01
Supplement: c1ce05723e_2.pdf [file c1ce05723e_2.pdf]

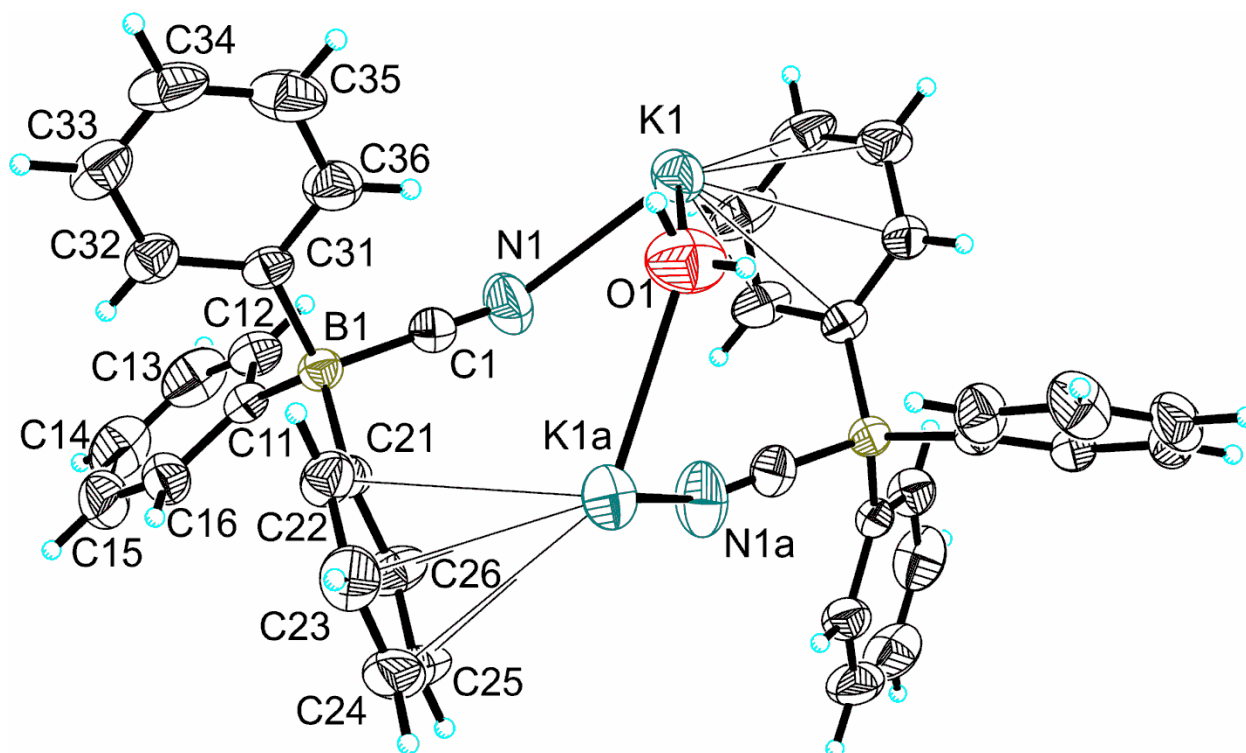

Figure 1 . ORTEP plot and numbering scheme of potassium triphenylcyanoborate.

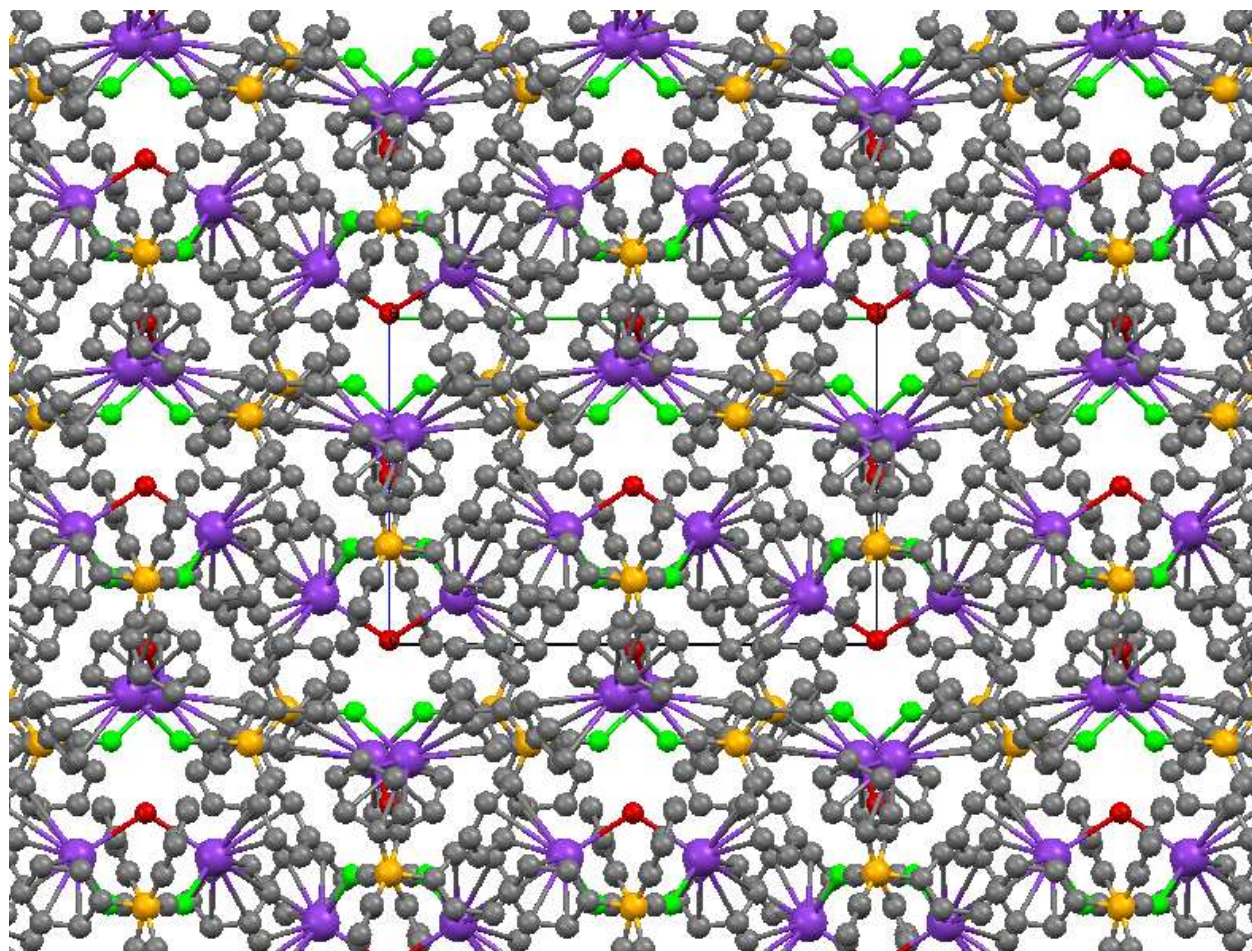

Figure 2 . Packing of potassium triphenylcyanoborate. View along b axis.

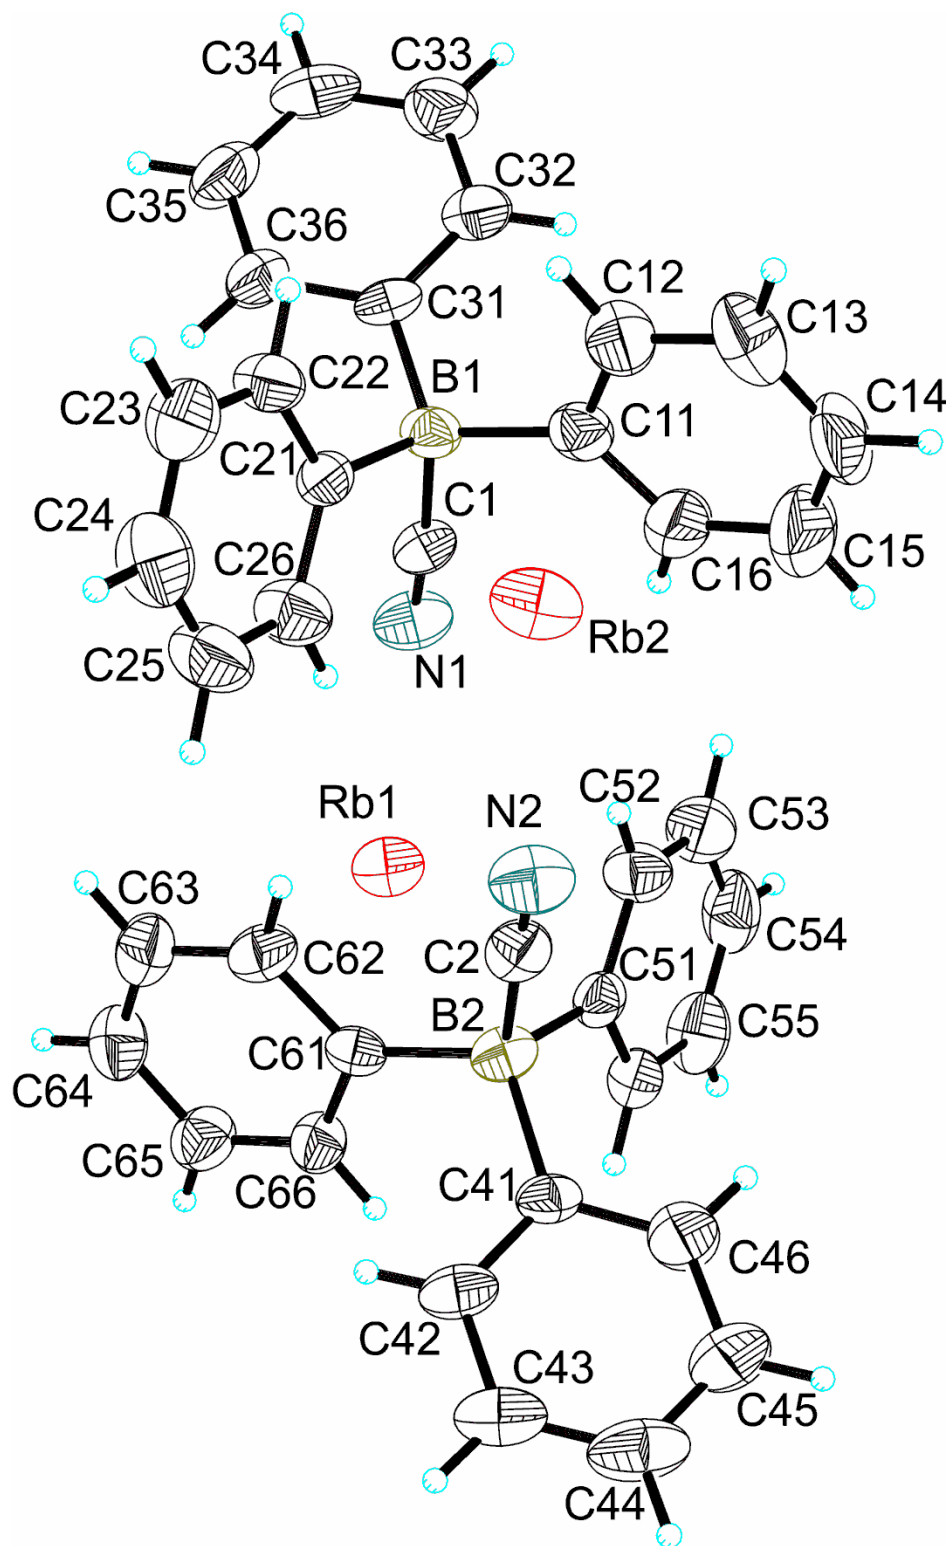

Figure 3 . ORTEP plot and numbering scheme in Rubidium triphenylcyanoborate.

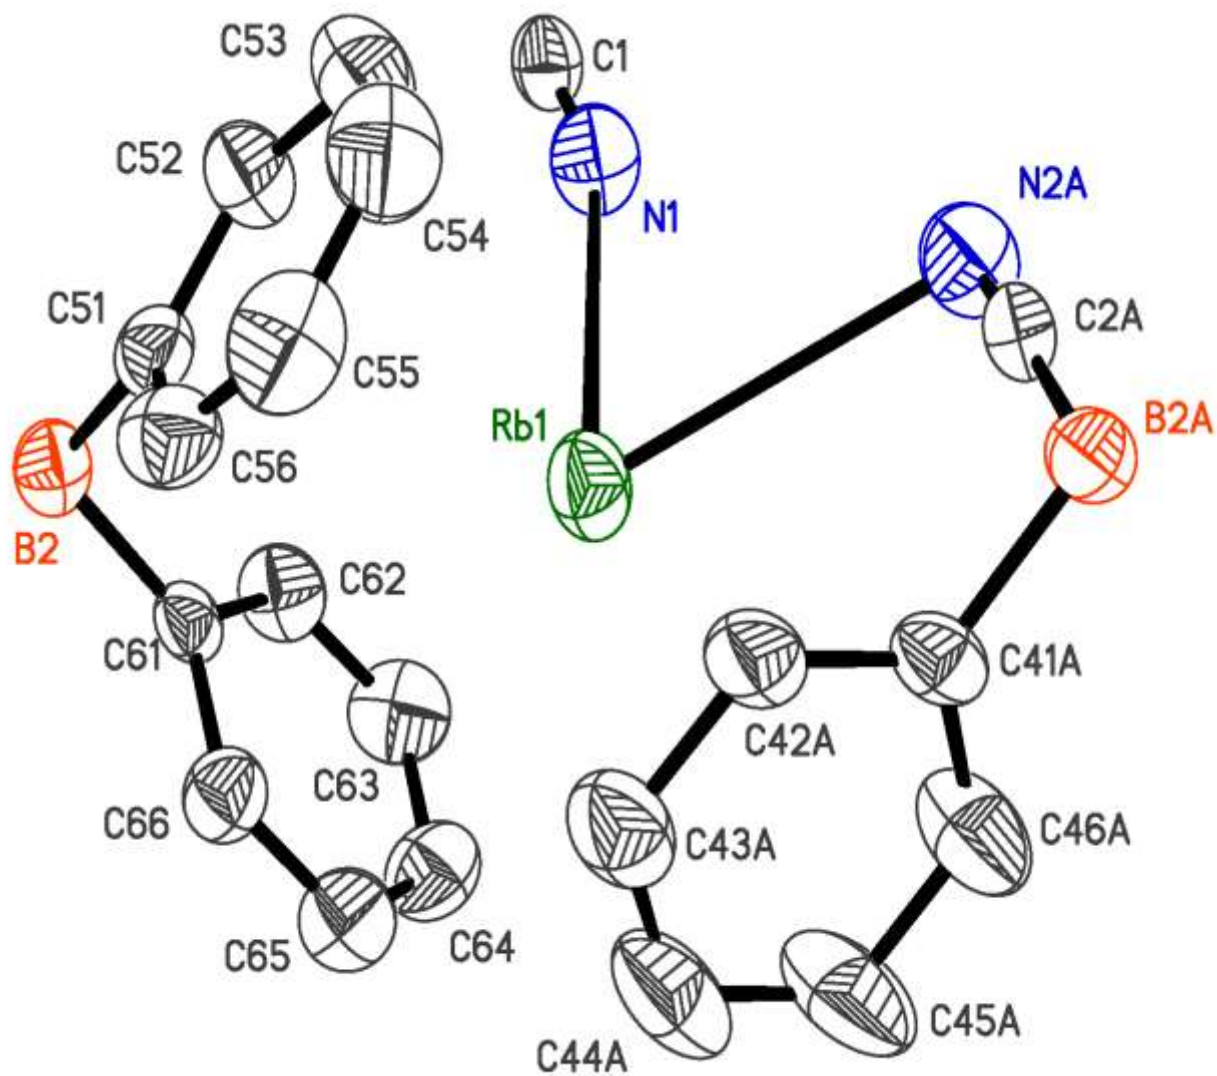

Figure 4. Environment of Rubidium ion with a numbering scheme.



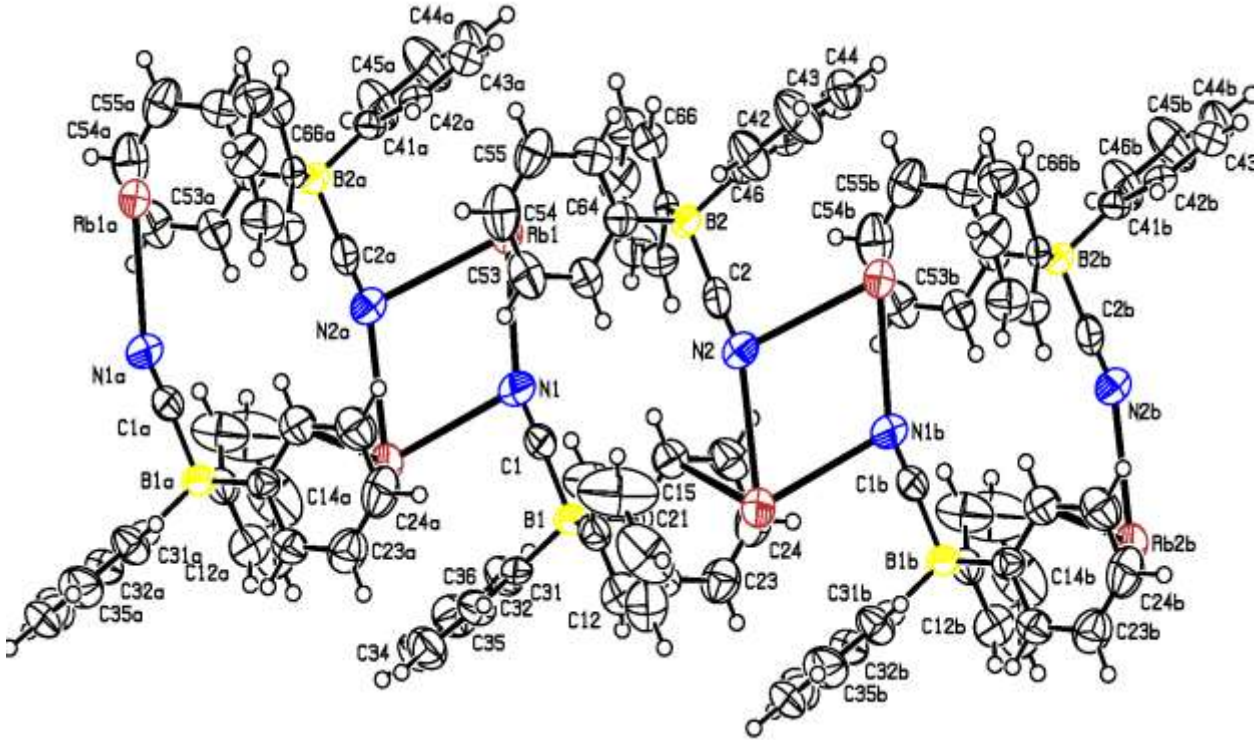

Figure 5. Chain of Rubidium triphenylcyanoborate dimers.

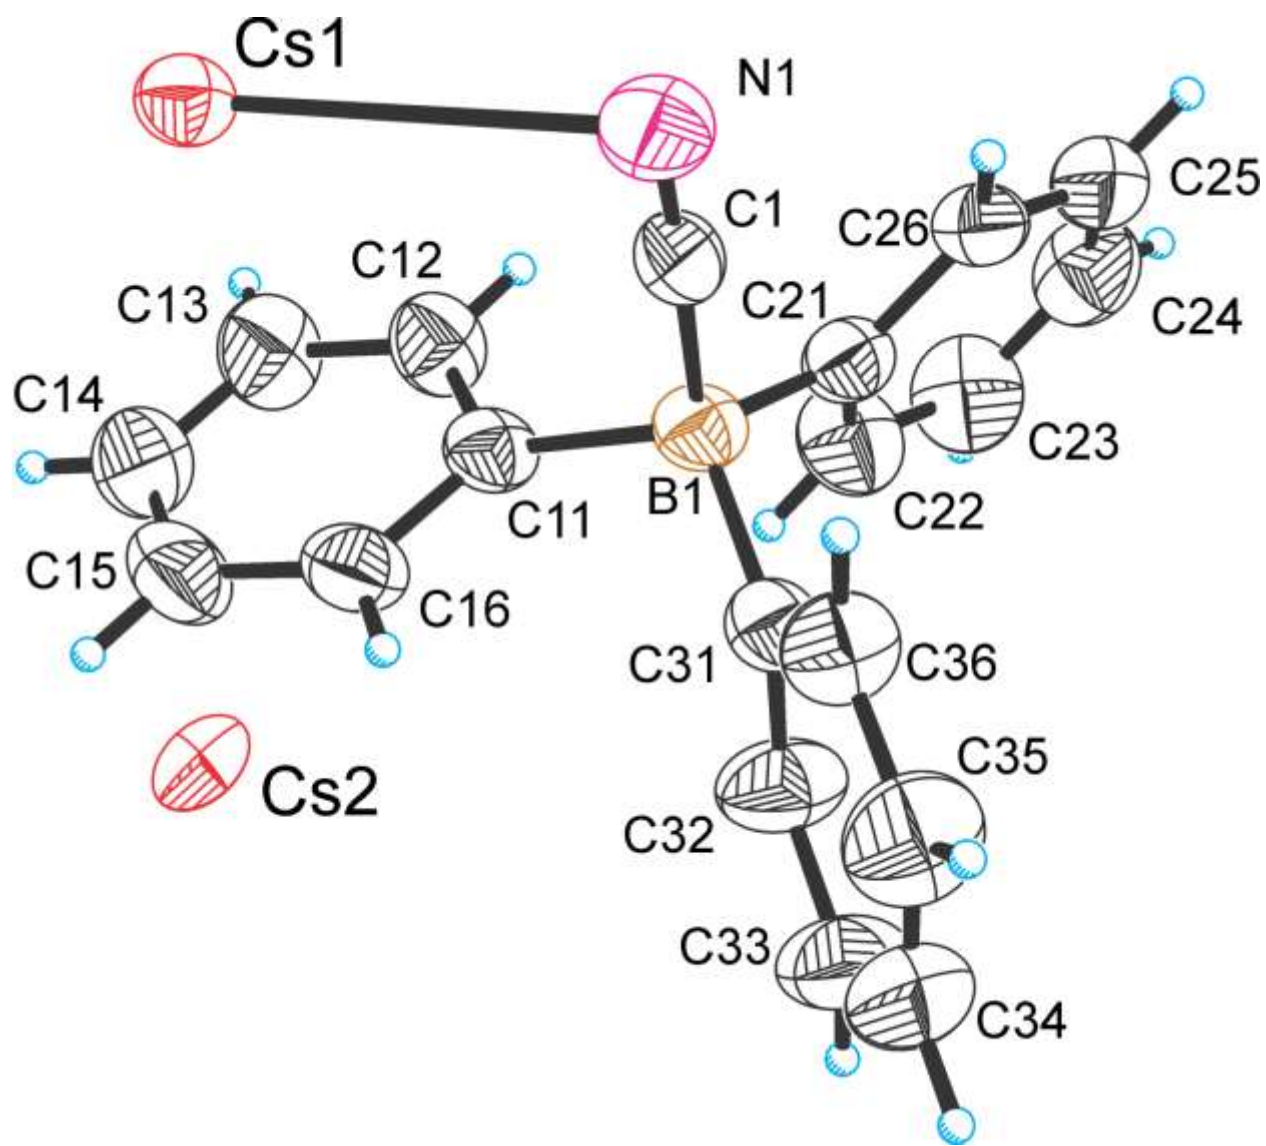

Figure 6. ORTEP plot and numbering Scheme of cesium triphenylcyanoborate.

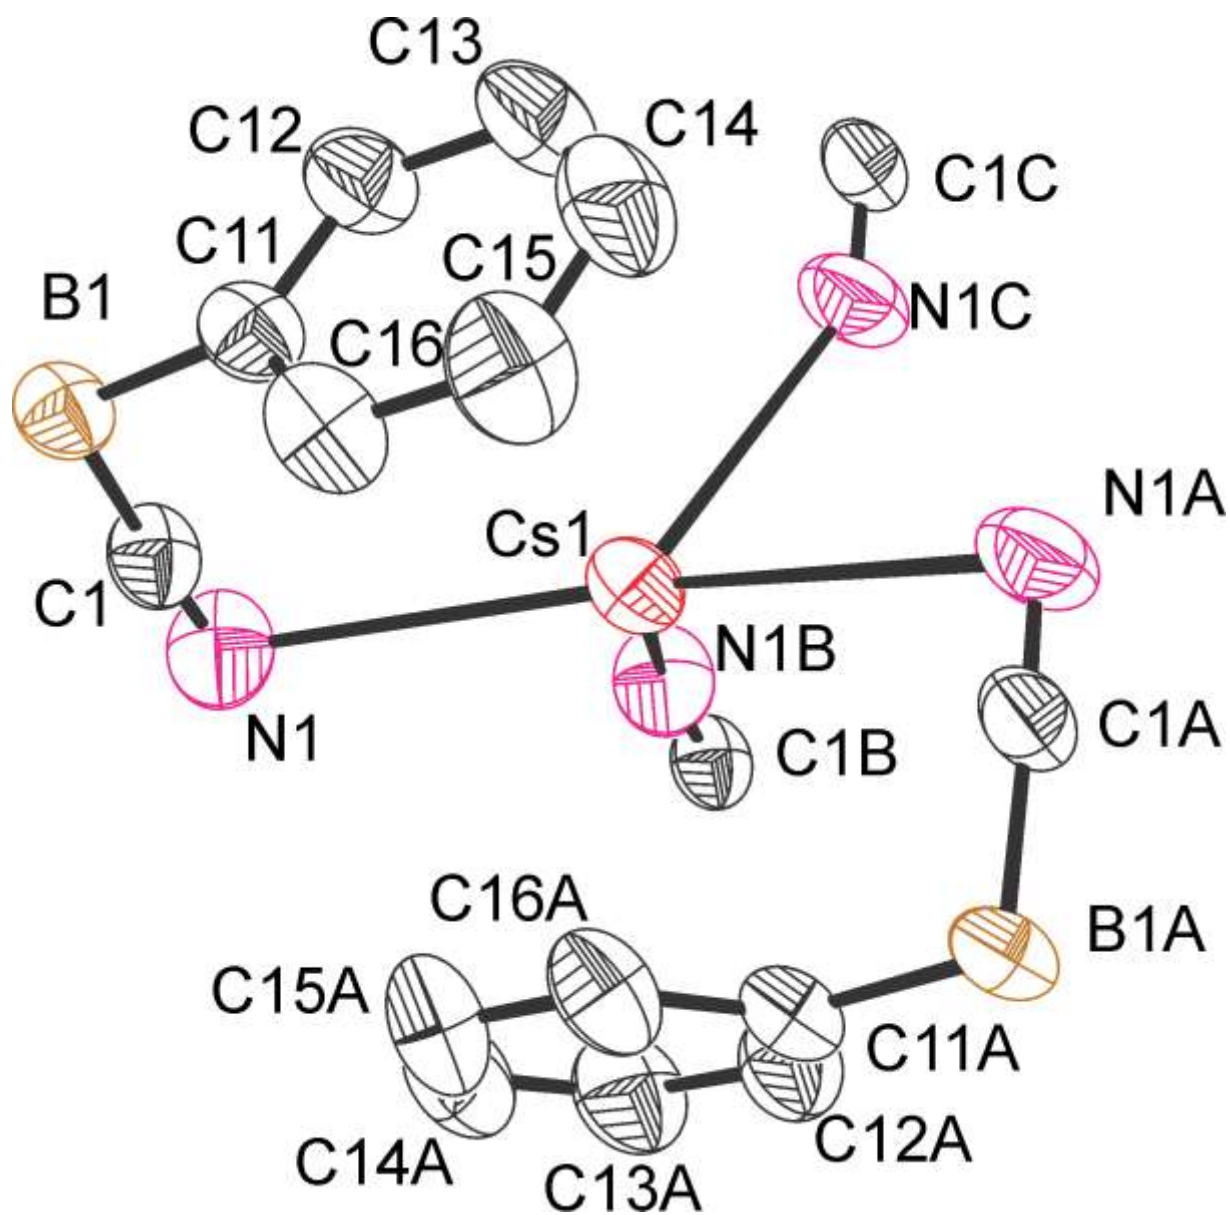

Figure 7. ORTEP view of Cs1 ion environment with the numbering scheme.

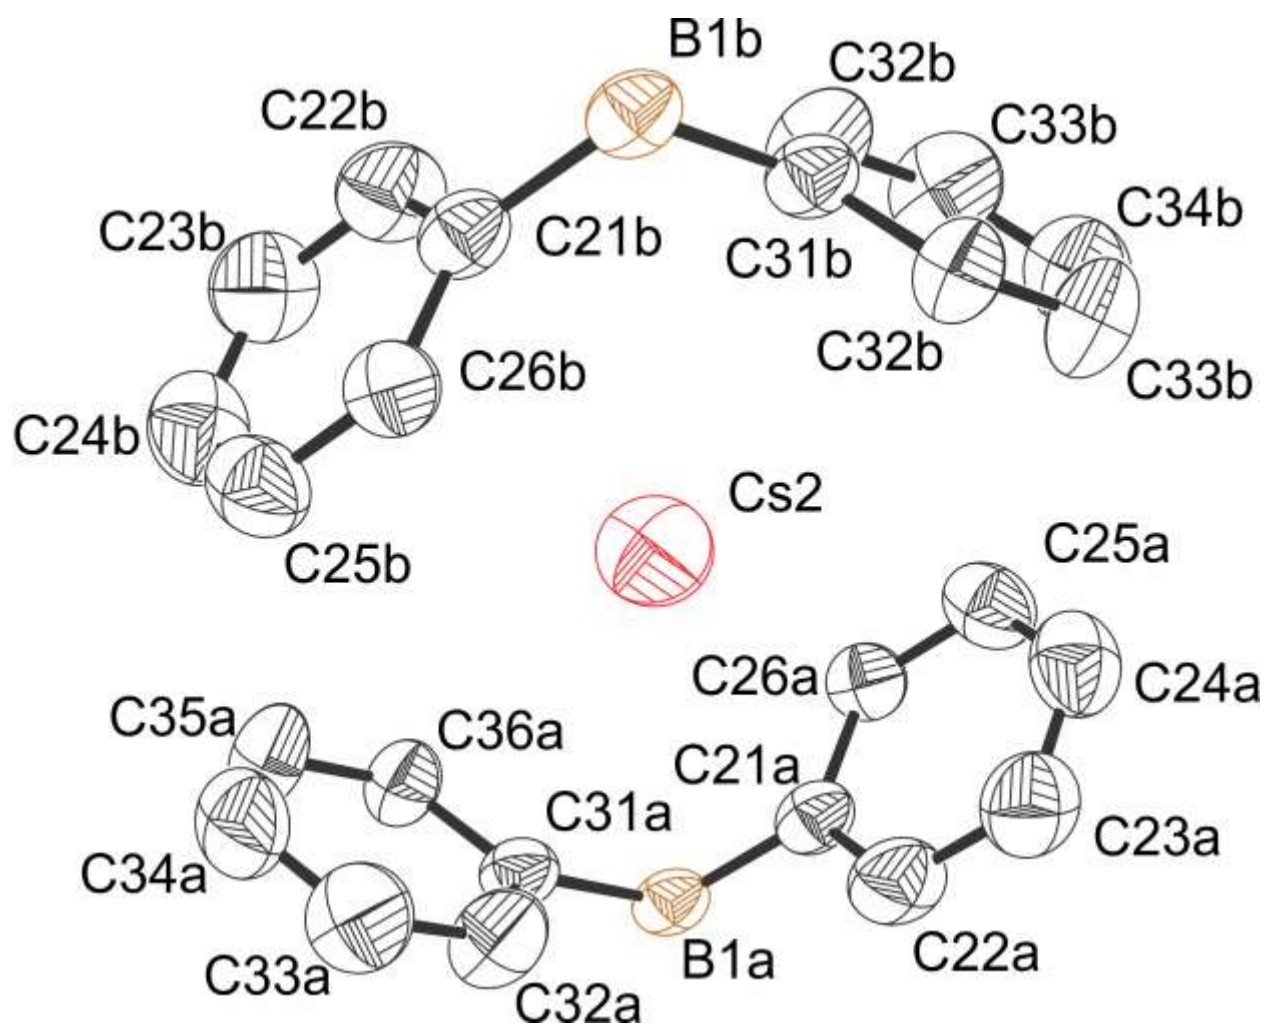

Figure 8. ORTEP view of environment of  $\text{Cs}_2$  ion with numbering scheme.



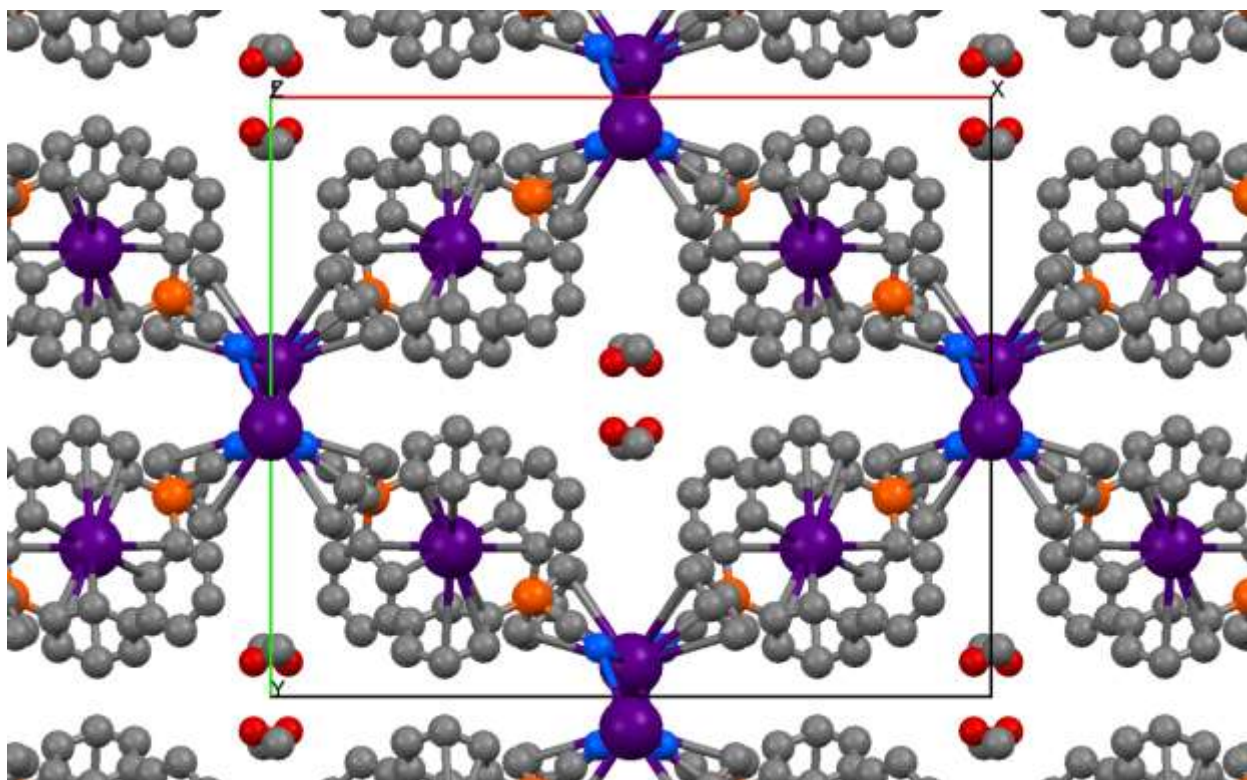

Figure 9. View of Packing along C axis with solvent molecules occupying the channels.

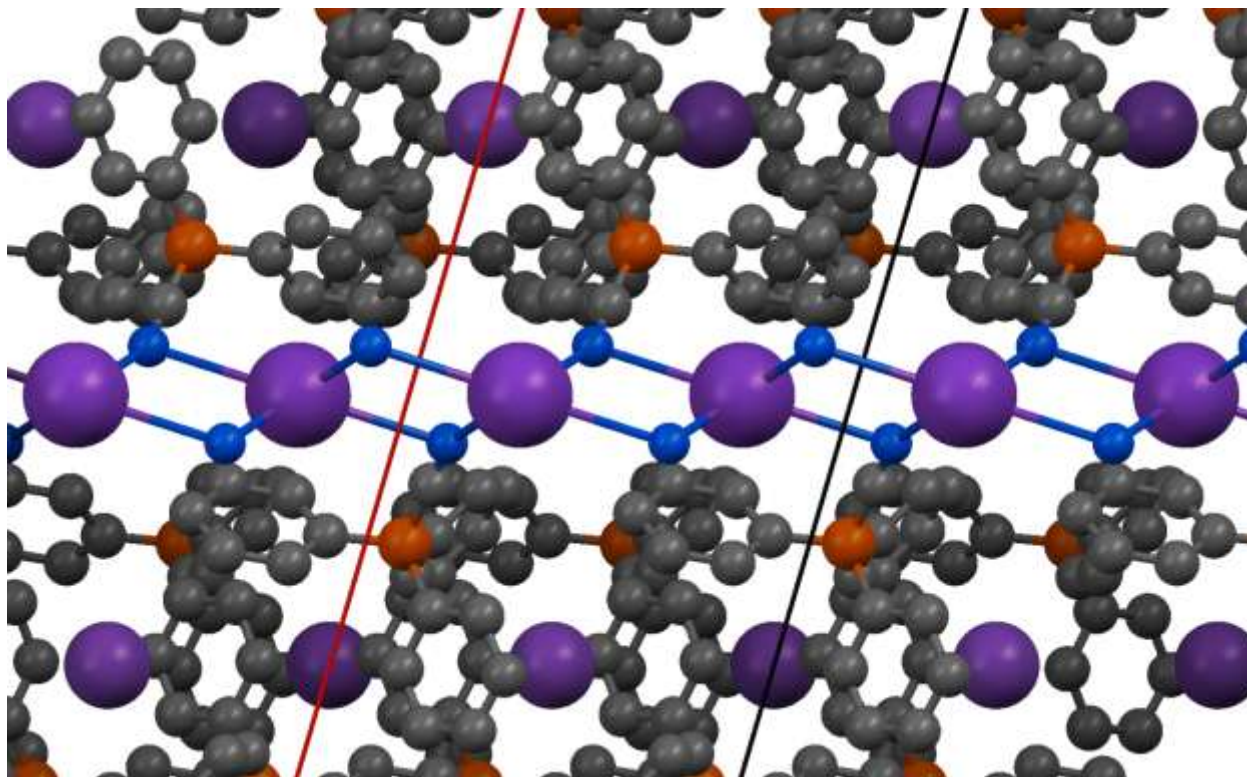

Figure 10 . View of packing along b axis. Solvent molecules omitted.
